# Supplementary material for: Impact of Pressure on Arsenic Released from Pore Water in Clayey Sediment
Source: MDPI journal article supplement (doi:10.3390/toxics10120738), 2022-11-29
Supplement: s1 [file s1]

## Supporting Information

**Table S1.** Characteristics of complete pore water chemistry results during compaction in different compaction rates.

| Sample | Eh    | pH   | EC    | Na   | Mg   | K     | Ca   | Zn    | Al    | Fe   | Mn   | Cl <sup>-</sup> | NO <sub>3</sub> <sup>-</sup> | SO <sub>4</sub> <sup>2-</sup> | As   | As(III) | DOC  | Fe <sup>2+</sup> | NH <sub>4</sub> <sup>+</sup> -N |
|--------|-------|------|-------|------|------|-------|------|-------|-------|------|------|-----------------|------------------------------|-------------------------------|------|---------|------|------------------|---------------------------------|
|        | mV    |      | μs/cm |      |      |       |      |       | mg/L  |      |      |                 |                              |                               | μg/L | μg/L    | mg/L | mg/L             | mg/L                            |
| A-12   | -20.5 | 7.9  | 636   | 2.80 | 4.51 | 0.170 | 23.4 | 0.003 | 0.077 | 1.88 | 1.11 | 4.60            | 7.64                         | 7.83                          | 10.1 | 2.6     | 6.93 | 1.38             | 0.50                            |
| A-24   | -87.5 | 7.82 | 666   | 2.89 | 4.86 | 0.273 | 24.6 | 0.015 | 0.024 | 2.38 | 1.31 | 4.58            | 7.47                         | 6.50                          | 16.1 | 7.3     | 8.30 | 1.13             | 1.00                            |
| A-36   | -93.4 | 7.64 | 682   | 4.13 | 5.26 | 0.205 | 26.2 | 0.008 | 0.055 | 3.00 | 1.43 | 4.52            | 6.18                         | 6.25                          | 12.3 | 5.1     | 6.82 | 1.00             | 0.75                            |
| A-48   | -90.6 | 7.65 | 682   | 2.90 | 4.93 | 0.274 | 25.1 | 0.008 | 0.018 | 2.63 | 1.52 | 4.61            | 6.24                         | 5.78                          | 11.4 | 3.6     | 6.30 | 1.00             | 0.88                            |
| A-60   | -92.0 | 7.62 | 683   | 3.02 | 5.01 | 0.127 | 25.3 | 0.008 | 0.018 | 2.75 | 1.60 | 4.46            | 5.55                         | 5.52                          | 13.4 | 4.2     | 6.25 | 1.00             | 1.25                            |
| A-72   | -92.7 | 7.73 | 676   | 3.03 | 4.98 | 0.123 | 24.7 | 0.016 | 0.019 | 3.25 | 1.62 | 4.35            | 5.88                         | 5.87                          | 13.9 | 3.6     | 6.17 | 1.00             | 1.50                            |

|       |        |      |     |      |      |       |      |       |       |      |      |      |      |      |      |      |      |      |      |
|-------|--------|------|-----|------|------|-------|------|-------|-------|------|------|------|------|------|------|------|------|------|------|
| A-84  | -80.6  | 7.84 | 672 | 3.09 | 4.95 | 0.139 | 25.2 | 0.006 | 0.03  | 2.25 | 1.63 | 4.37 | 5.35 | 5.44 | 12.6 | 3.7  | 6.45 | 0.75 | 1.25 |
| A-96  | -91.3  | 7.97 | 673 | 3.45 | 5.15 | 0.117 | 25.4 | 0.007 | 0.062 | 2.75 | 1.67 | 4.48 | 4.93 | 5.00 | 10.9 | 2.9  | 6.37 | 0.75 | 1.00 |
| A-108 | -84.5  | 7.95 | 667 | 2.86 | 5.04 | 0.226 | 24.6 | 0.009 | 0.023 | 2.63 | 1.65 | 4.28 | 3.70 | 4.99 | 8.7  | 2.2  | 6.41 | 1.00 | 1.25 |
| A-120 | -66.3  | 8.01 | 615 | 2.78 | 4.75 | 0.133 | 24   | 0.004 | 0.022 | 2.13 | 1.64 | 4.10 | 2.46 | 4.87 | 7.6  | 2.0  | 6.58 | 1.00 | 1.25 |
| B-12  | -15.7  | 8.09 | 794 | 3.17 | 6.07 | 0.323 | 27.3 | 0.010 | 0.034 | 5.50 | 0.97 | 4.21 | 7.30 | 7.09 | 14.1 | 3.9  | 6.01 | 2.44 | 2.50 |
| B-36  | -73.2  | 7.74 | 832 | 2.9  | 6.27 | 0.223 | 27.4 | 0.030 | 0.078 | 5.51 | 1.05 | 4.05 | 5.86 | 6.11 | 26.9 | 11.9 | 6.88 | 2.44 | 1.75 |
| B-60  | -89.3  | 7.18 | 777 | 2.99 | 6.91 | 0.212 | 30.4 | 0.010 | 0.118 | 7.00 | 1.16 | 3.98 | 3.73 | 5.27 | 36.4 | 22.0 | 7.54 | 2.63 | 2.75 |
| B-84  | -91.1  | 7.47 | 851 | 3.04 | 6.79 | 0.571 | 29.8 | 0.009 | 0.133 | 7.50 | 1.15 | 4.03 | 2.61 | 5.54 | 30.0 | 17.3 | 6.98 | 3.19 | 2.25 |
| B-108 | -101.9 | 7.61 | 851 | 3.01 | 6.79 | 0.200 | 30.0 | 0.012 | 0.030 | 4.28 | 1.15 | 4.02 | 1.83 | 5.25 | 24.2 | 12.1 | 6.79 | 2.25 | 0.75 |
| B-132 | -91.6  | 7.59 | 844 | 2.95 | 6.64 | 0.222 | 30.0 | 0.02  | 0.041 | 6.25 | 1.13 | 4.04 | 1.66 | 5.20 | 22.7 | 12.3 | 6.22 | 2.81 | 1.25 |
| B-156 | -97.2  | 7.68 | 844 | 3.73 | 7.06 | 0.220 | 31.3 | 0.012 | 0.050 | 5.40 | 1.12 | 4.23 | 1.08 | 4.96 | 20.3 | 6.4  | 5.74 | 1.31 | 2.50 |
| B-180 | -97.9  | 7.89 | 840 | 3.37 | 6.86 | 0.178 | 30.8 | 0.006 | 0.040 | 6.00 | 1.11 | 3.84 | 0.57 | 3.56 | 23.9 | 7.1  | 5.87 | 1.31 | 2.00 |
| B-204 | -86.0  | 7.95 | 839 | 3.78 | 6.96 | 0.233 | 30.8 | 0.008 | 0.022 | 5.75 | 1.11 | 4.01 | 0.56 | 3.93 | 14.9 | 4.0  | 5.60 | 1.88 | 2.00 |
| B-228 | -97.4  | 7.98 | 842 | 3.72 | 6.69 | 0.466 | 29.8 | 0.006 | 0.022 | 4.28 | 1.09 | 4.14 | 0.32 | 3.03 | 11.1 | 3.3  | 5.75 | 1.69 | 1.75 |
| C-12  | -25.6  | 7.84 | 849 | 2.89 | 6.43 | 0.192 | 30.6 | 0.017 | 0.043 | 5.38 | 1.17 | 4.48 | 7.92 | 7.52 | 15.7 | 4.7  | 6.22 | 2.25 | 2.00 |
| C-36  | -91.6  | 7.87 | 860 | 5.25 | 8.53 | 0.262 | 38.8 | 0.019 | 0.308 | 6.63 | 1.14 | 4.01 | 6.48 | 6.16 | 28.4 | 11.6 | 6.79 | 4.00 | 1.25 |

|       |        |      |     |      |      |       |      |       |       |      |      |      |      |      |      |      |      |      |      |
|-------|--------|------|-----|------|------|-------|------|-------|-------|------|------|------|------|------|------|------|------|------|------|
| C-60  | -87.4  | 7.12 | 796 | 3.93 | 6.94 | 0.182 | 32.4 | 0.020 | 0.089 | 7.50 | 1.23 | 3.89 | 5.84 | 5.92 | 30.5 | 17.4 | 6.81 | 2.50 | 2.00 |
| C-84  | -102   | 7.52 | 843 | 4.49 | 7.07 | 0.199 | 32.7 | 0.007 | 0.077 | 4.88 | 1.23 | 3.89 | 2.48 | 5.23 | 23.4 | 12.2 | 6.74 | 2.00 | 1.75 |
| C-108 | -97.2  | 7.65 | 850 | 3.23 | 6.67 | 0.173 | 31.8 | 0.018 | 0.031 | 7.00 | 1.20 | 3.80 | 1.66 | 5.36 | 24.8 | 13.1 | 6.29 | 2.00 | 1.00 |
| C-132 | -95.8  | 7.65 | 835 | 3.74 | 6.63 | 0.187 | 31.3 | 0.005 | 0.033 | 6.38 | 1.18 | 3.80 | 0.65 | 5.29 | 19.6 | 10.4 | 6.27 | 3.50 | 2.00 |
| C-156 | -96.4  | 7.64 | 845 | 3.03 | 6.53 | 0.143 | 30.3 | 0.011 | 0.090 | 6.75 | 1.17 | 4.59 | 0.57 | 4.90 | 19.4 | 7.8  | 6.05 | 2.00 | 2.25 |
| C-204 | -98.9  | 7.79 | 842 | 3.29 | 6.73 | 0.175 | 31.4 | 0.008 | 0.099 | 6.13 | 1.16 | 3.97 | 0.55 | 3.94 | 21.1 | 8.0  | 6.18 | 1.50 | 1.25 |
| C-252 | -107.8 | 7.84 | 836 | 3.69 | 6.5  | 0.475 | 30.4 | 0.008 | 0.037 | 5.13 | 1.12 | 3.80 | 0.58 | 3.79 | 15.7 | 5.0  | 5.99 | 1.75 | 1.25 |
| C-300 | -86.8  | 8.09 | 834 | 1.53 | 3.27 | 0.103 | 15.9 | 0.012 | 0.055 | 5.13 | 0.55 | 3.88 | 0.60 | 3.89 | 16.5 | 5.1  | 6.02 | 0.75 | 1.50 |
| C-348 | -92.5  | 8.23 | 815 | 1.51 | 3.29 | 0.117 | 15.6 | 0.013 | 0.054 | 2.00 | 0.55 | 2.24 | 0.50 | 3.42 | 13.2 | 3.6  | 6.16 | 1.00 | 1.50 |
| C-396 | -89.0  | 8.00 | 762 | 1.61 | 3.28 | 0.076 | 14.5 | 0.009 | 0.015 | 3.88 | 0.44 | 2.13 | 0.58 | 3.23 | 10.2 | 2.6  | 5.43 | 1.25 | 1.50 |
| C-444 | -76.6  | 7.89 | 764 | 1.54 | 3.06 | 0.245 | 13.6 | 0.011 | 0.029 | 2.30 | 0.41 | 2.88 | 0.52 | 3.52 | 6.7  | 1.3  | 5.52 | 1.60 | 1.25 |

**Table S2** Characteristics of complete pore water chemistry results during compaction in different compaction patterns.

| Sample | Eh     | pH   | Na   | Mg   | K     | Ca   | Zn    | Al    | Fe   | Mn   | Cl <sup>-</sup> | NO <sub>3</sub> <sup>-</sup> | SO <sub>4</sub> <sup>2-</sup> | As   | As(III) | DO<br>C  | Fe <sup>2+</sup> | NH <sub>4</sub> -N |
|--------|--------|------|------|------|-------|------|-------|-------|------|------|-----------------|------------------------------|-------------------------------|------|---------|----------|------------------|--------------------|
|        | mV     |      |      |      |       |      |       | mg/L  |      |      |                 |                              |                               | µg/L | µg/L    | mg/<br>L | mg/<br>L         | mg/L               |
| D-12   | -18.9  | 7.94 | 2.91 | 5.48 | 0.321 | 20.3 | 0.055 | 0.127 | 5.25 | 0.88 | 4.30            | 7.21                         | 7.95                          | 16.8 | 4.4     | 5.97     | 2.25             | 0.50               |
| D-36   | -59.9  | 7.74 | 2.66 | 4.06 | 0.128 | 20.7 | 0.009 | 0.022 | 5.75 | 0.88 | 4.19            | 5.67                         | 6.22                          | 23.9 | 11.5    | 6.79     | 2.00             | 0.75               |
| D-60   | -94.0  | 7.23 | 2.41 | 4.02 | 0.171 | 20.2 | 0.006 | 0.015 | 6.50 | 0.93 | 4.09            | 3.04                         | 6.02                          | 32.1 | 17.2    | 6.90     | 1.50             | 1.25               |
| D-84   | -108.9 | 7.58 | 2.75 | 4.25 | 0.137 | 21.4 | 0.018 | 0.043 | 5.25 | 1.00 | 4.14            | 2.24                         | 5.81                          | 27.4 | 15.3    | 5.85     | 1.50             | 1.25               |
| D-108  | -97.5  | 7.53 | 4.08 | 4.45 | 0.159 | 22.4 | 0.008 | 0.125 | 4.75 | 1.02 | 4.02            | 1.46                         | 5.76                          | 27.9 | 13.4    | 5.71     | 2.25             | 1.25               |
| D-120  | -95.0  | 7.61 | 2.55 | 4.26 | 1.910 | 21.1 | 0.001 | 0.002 | 4.00 | 0.78 | 7.29            | 0.57                         | 5.79                          | 42.9 | 25.8    | 4.49     | 2.50             | 1.25               |
| D-132  | -91.4  | 7.71 | 1.29 | 3.40 | 1.680 | 10.8 | 0.018 | 0.067 | 3.75 | 0.59 | 3.99            | 0.51                         | 5.33                          | 47.4 | 21.5    | 4.99     | 1.75             | 1.00               |
| D-144  | -96.6  | 7.75 | 3.61 | 4.12 | 0.359 | 20.7 | 0.013 | 0.038 | 5.75 | 1.10 | 4.35            | 0.54                         | 4.51                          | 34.9 | 11.0    | 3.32     | 1.50             | 1.00               |

|       |       |      |      |      |       |      |       |       |      |      |      |      |      |      |      |      |      |      |
|-------|-------|------|------|------|-------|------|-------|-------|------|------|------|------|------|------|------|------|------|------|
| D-156 | -88.9 | 7.73 | 2.48 | 4.08 | 1.780 | 20.2 | 0.009 | 0.020 | 4.50 | 1.09 | 4.01 | 0.58 | 4.75 | 37.0 | 11.3 | 2.21 | 2.75 | 1.25 |
| D-168 | -90.5 | 7.77 | 2.54 | 4.45 | 0.210 | 21.3 | 0.024 | 0.05  | 5.50 | 1.08 | 4.19 | 0.52 | 3.23 | 33.4 | 8.4  | 1.71 | 2.00 | 1.00 |
| E-12  | -18.1 | 7.91 | 3.28 | 4.13 | 0.255 | 20.2 | 0.010 | 0.039 | 2.00 | 0.91 | 4.39 | 8.21 | 7.12 | 10.8 | 2.9  | 6.67 | 1.25 | 2.50 |
| E-24  | -62.3 | 7.83 | 1.35 | 1.85 | 0.175 | 9.24 | 0.013 | 0.015 | 2.00 | 0.46 | 2.32 | 7.88 | 7.07 | 14.4 | 6.8  | 8.92 | 0.75 | 1.75 |
| E-36  | -75.0 | 7.67 | 2.35 | 3.86 | 0.184 | 19.5 | 0.025 | 0.031 | 2.00 | 0.98 | 4.32 | 5.91 | 6.83 | 12.8 | 5.4  | 6.95 | 1.00 | 2.75 |
| E-48  | -73.9 | 7.70 | 4.33 | 5.23 | 0.282 | 25.6 | 0.008 | 0.156 | 2.63 | 1.05 | 4.14 | 5.45 | 6.98 | 12.7 | 4.6  | 6.90 | 0.88 | 2.25 |
| E-60  | -85.6 | 7.74 | 3.82 | 3.98 | 1.370 | 21.7 | 0.012 | 0.043 | 2.25 | 1.06 | 7.88 | 5.77 | 7.00 | 13.7 | 4.7  | 6.95 | 1.00 | 0.75 |
| E-84  | -79.8 | 7.70 | 2.30 | 3.86 | 0.187 | 19.3 | 0.005 | 0.021 | 2.38 | 1.08 | 4.11 | 5.79 | 6.60 | 11.7 | 2.9  | 6.90 | 0.63 | 1.25 |
| E-108 | -76.3 | 7.82 | 2.36 | 3.96 | 0.168 | 19.3 | 0.012 | 0.038 | 1.88 | 1.13 | 4.37 | 4.83 | 6.39 | 9.8  | 2.4  | 6.94 | 0.75 | 2.50 |
| E-132 | -72.5 | 7.95 | 4.37 | 4.61 | 0.226 | 22.3 | 0.016 | 0.084 | 2.25 | 1.18 | 4.14 | 4.96 | 5.53 | 5.0  | 1.5  | 6.34 | 0.88 | 2.00 |
| E-156 | -77.4 | 7.93 | 2.41 | 3.99 | 0.167 | 19.5 | 0.008 | 0.028 | 2.00 | 1.18 | 4.16 | 3.12 | 5.48 | 5.0  | 1.3  | 6.56 | 0.63 | 2.00 |
| E-180 | -68.5 | 7.99 | 2.50 | 4.10 | 0.146 | 19.8 | 0.008 | 0.044 | 1.50 | 1.22 | 4.12 | 1.46 | 3.43 | 4.3  | 1.5  | 6.07 | 0.63 | 1.75 |
